# Supplementary material for: Complete Surgical Excision Is Necessary following Vacuum-Assisted Biopsy for Breast Cancer
Source: Curr Oncol. 2022 Nov 30;29(12):9357–64. doi: 10.3390/curroncol29120734 (PMC9777068; doi:10.3390/curroncol29120734)
Supplement: Supplementary file 1 [file curroncol-29-00734-s001.zip › curroncol-2054887-supplementary.pdf]

**Patients with breast cancer who underwent surgery  
between 2003 and 2021 (n=3,289)**

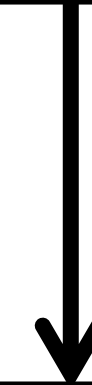

**Patients who were diagnosed after vacuum-assisted  
breast biopsy under ultrasonography (n=52)**

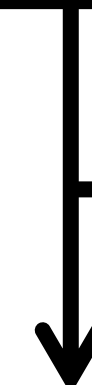

**Patients included in the study (n=49)**  
- Unilateral (n=48)  
- Bilateral (n=1)

**Diagnosis with benign lesion after slide review (n=3)**  
- Lobular carcinoma *in situ* (n=1)  
- Atypical ductal hyperplasia (n=1)  
- Flat epithelial atypia (n=1)
