# Supplementary figures and images for: Complete Surgical Excision Is Necessary following Vacuum-Assisted Biopsy for Breast Cancer
Source: MDPI journal article supplement (doi:10.3390/curroncol29120734), 2022-11-30

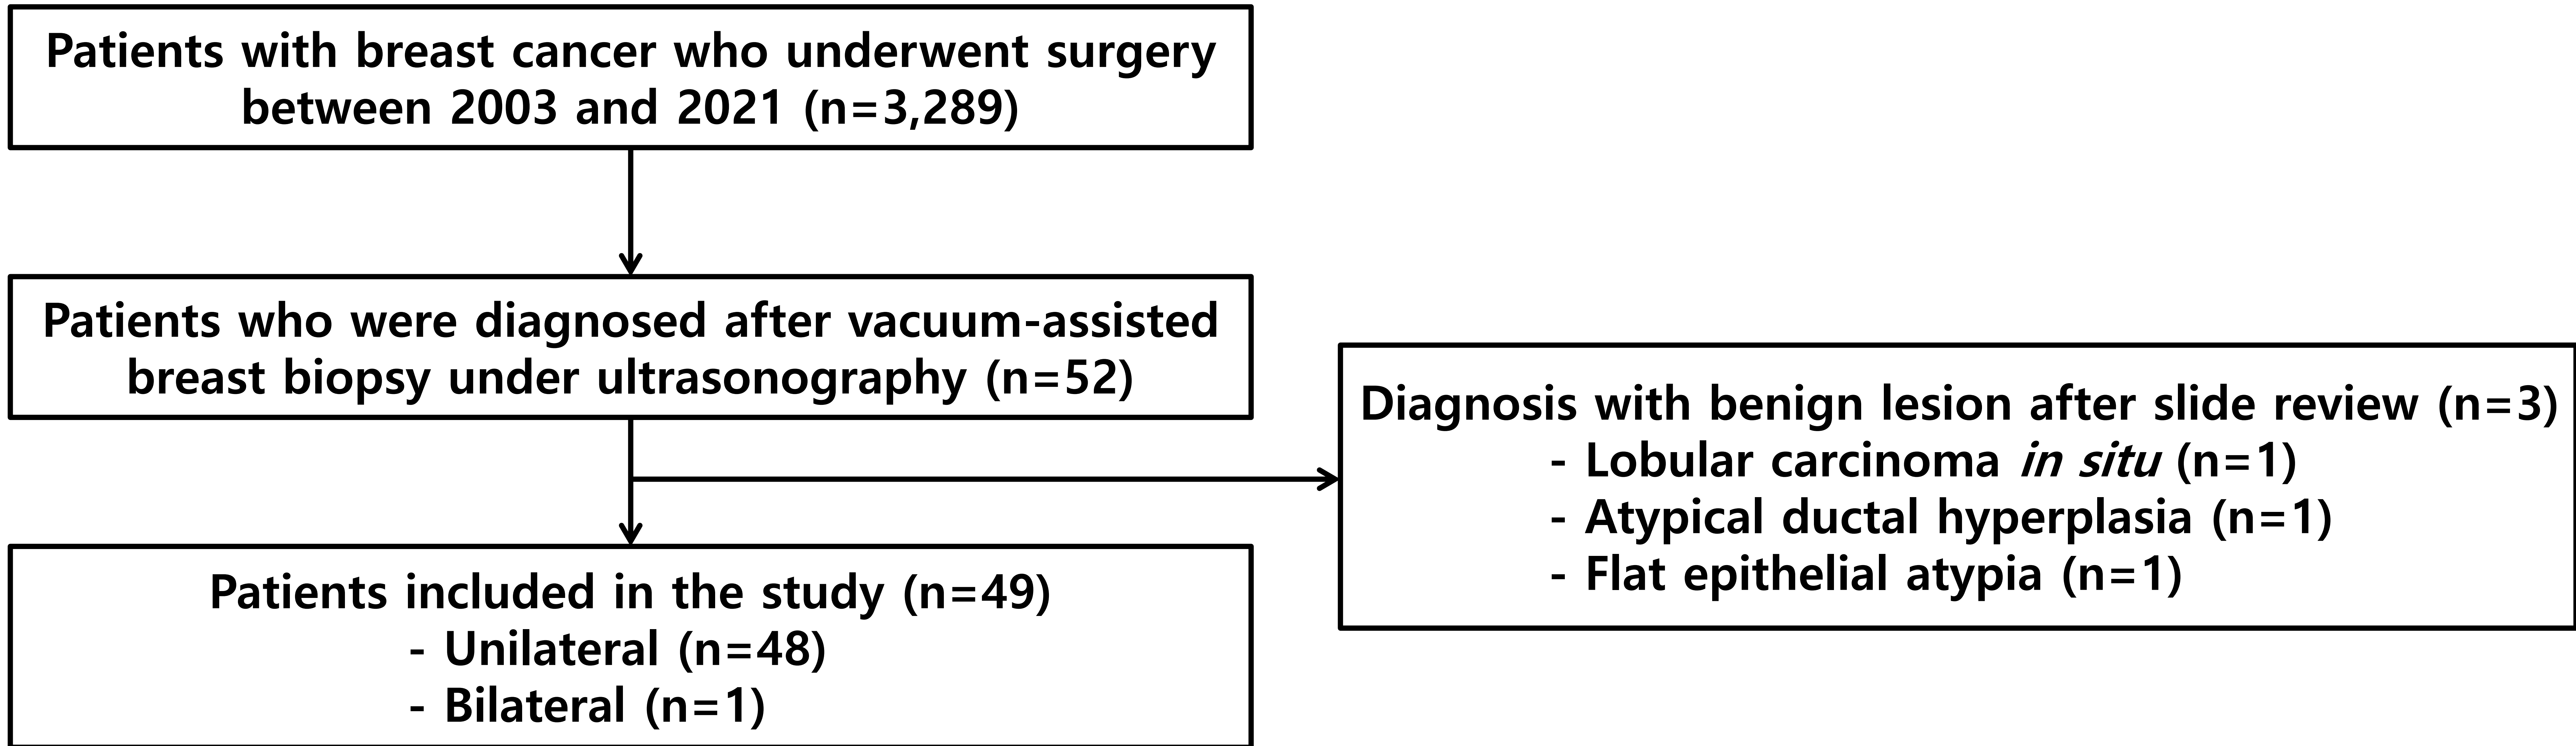

Supplement: s1 [file s1]
